# Supplementary material
Source: publisher site journal article supplement (https://www.dovepress.com/article/405929)

**Additional File**

**Table of Contents**

**Additional Table 1.** Search Strategies

**Additional Figure 1.** Description of Newcastle Ottawa Scale

**Additional Table 2.** Newcastle Ottawa Scale study quality assessment

**Additional Table 3** Univariate Meta-Regression results for the association between PM2.5 and PEF of children

**Additional Figure 2.** Funnel plot of changes in PEF (L/min) estimates associated with a 10µg/m3 increases in PM2.5

**Additional Figure 3.** Funnel plot of changes in FVC (L) estimates associated with a 10µg/m3 increases in PM2.5

**Additional Figure 4.** Funnel plot of changes in FEV1 (L) estimates associated with a 10µg/m3 increases in PM2.5

**Additional Table 1.** Search Strategies

**Additional Table 1.** Search Strategies used in PUBMED, EMBASE to identify studies examining the relationship between exposure to PM2.5 and Lung function in children. PUBMED searches used MeSH terms and EMBASE searches used Emtree terms .

| **Search queries for PUBMED** | | **Search queries for EMBASE** |
| --- | --- | --- |
| 1 | (PM2.5[Title/Abstract]) OR (Ultrafine Fibers[Title/Abstract])) OR (Ultrafine Fiber[Title/Abstract])) OR (Fiber, Ultrafine[Title/Abstract])) OR (Airborne Particulate Matter[Title/Abstract])) OR (Particulate Matter, Airborne[Title/Abstract])) OR (Air Pollutants, Particulate[Title/Abstract])) OR (Particulate Air Pollutants[Title/Abstract])) OR (Ambient Particulate Matter[Title/Abstract])) OR (Particulate Matter, Ambient[Title/Abstract])) OR("Particulate Matter"[Mesh]) | (pm2.5:ab,ti OR 'ultrafine fibers':ab,ti OR 'ultrafine fiber':ab,ti OR 'fiber, ultrafine':ab,ti OR 'airborne particulate matter':ab,ti OR 'particulate matter, airborne':ab,ti OR 'air pollutants, particulate':ab,ti OR 'particulate air pollutants':ab,ti OR 'ambient particulate matter':ab,ti OR 'particulate matter, ambient':ab,ti OR particulate matter 2.5'/exp) |
| 2 | AND(children[Title/Abstract]) OR ("Child"[Mesh]) | AND (children OR child'/exp) |
| 3 | AND (Function Test, Respiratory[Title/Abstract]) OR (Function Tests, Respiratory[Title/Abstract])) OR (Test, Respiratory Function[Title/Abstract])) OR (Tests, Respiratory Function[Title/Abstract])) OR (Pulmonary Function Tests[Title/Abstract])) OR (Function Test, Pulmonary[Title/Abstract])) OR (Function Tests, Pulmonary[Title/Abstract])) OR (Test, Pulmonary Function[Title/Abstract])) OR (Tests, Pulmonary Function[Title/Abstract])) OR (Lung Function Tests[Title/Abstract])) OR (Function Test, Lung[Title/Abstract])) OR (Function Tests, Lung[Title/Abstract])) OR (Lung Function Test[Title/Abstract])) OR (Test, Lung Function[Title/Abstract])) OR (Tests, Lung Function[Title/Abstract])) OR (Pulmonary Function Test[Title/Abstract])) OR ("Respiratory Function Tests"[Mesh]) | AND(function test, respiratory':ab,ti OR 'test, respiratory function':ab,ti OR 'tests, respiratory function':ab,ti OR 'pulmonary function tests':ab,ti OR 'function test, pulmonary':ab,ti OR 'function tests, pulmonary':ab,ti OR 'test, pulmonary function':ab,ti OR 'tests, pulmonary function':ab,ti OR 'lung function?tests':ab,ti OR 'function test, lung':ab,ti OR 'function tests, lung':ab,ti OR 'test,lung function':ab,ti OR 'tests,?lung function':ab,ti OR 'pulmonary function test':ab,ti OR lung function test'/exp) |


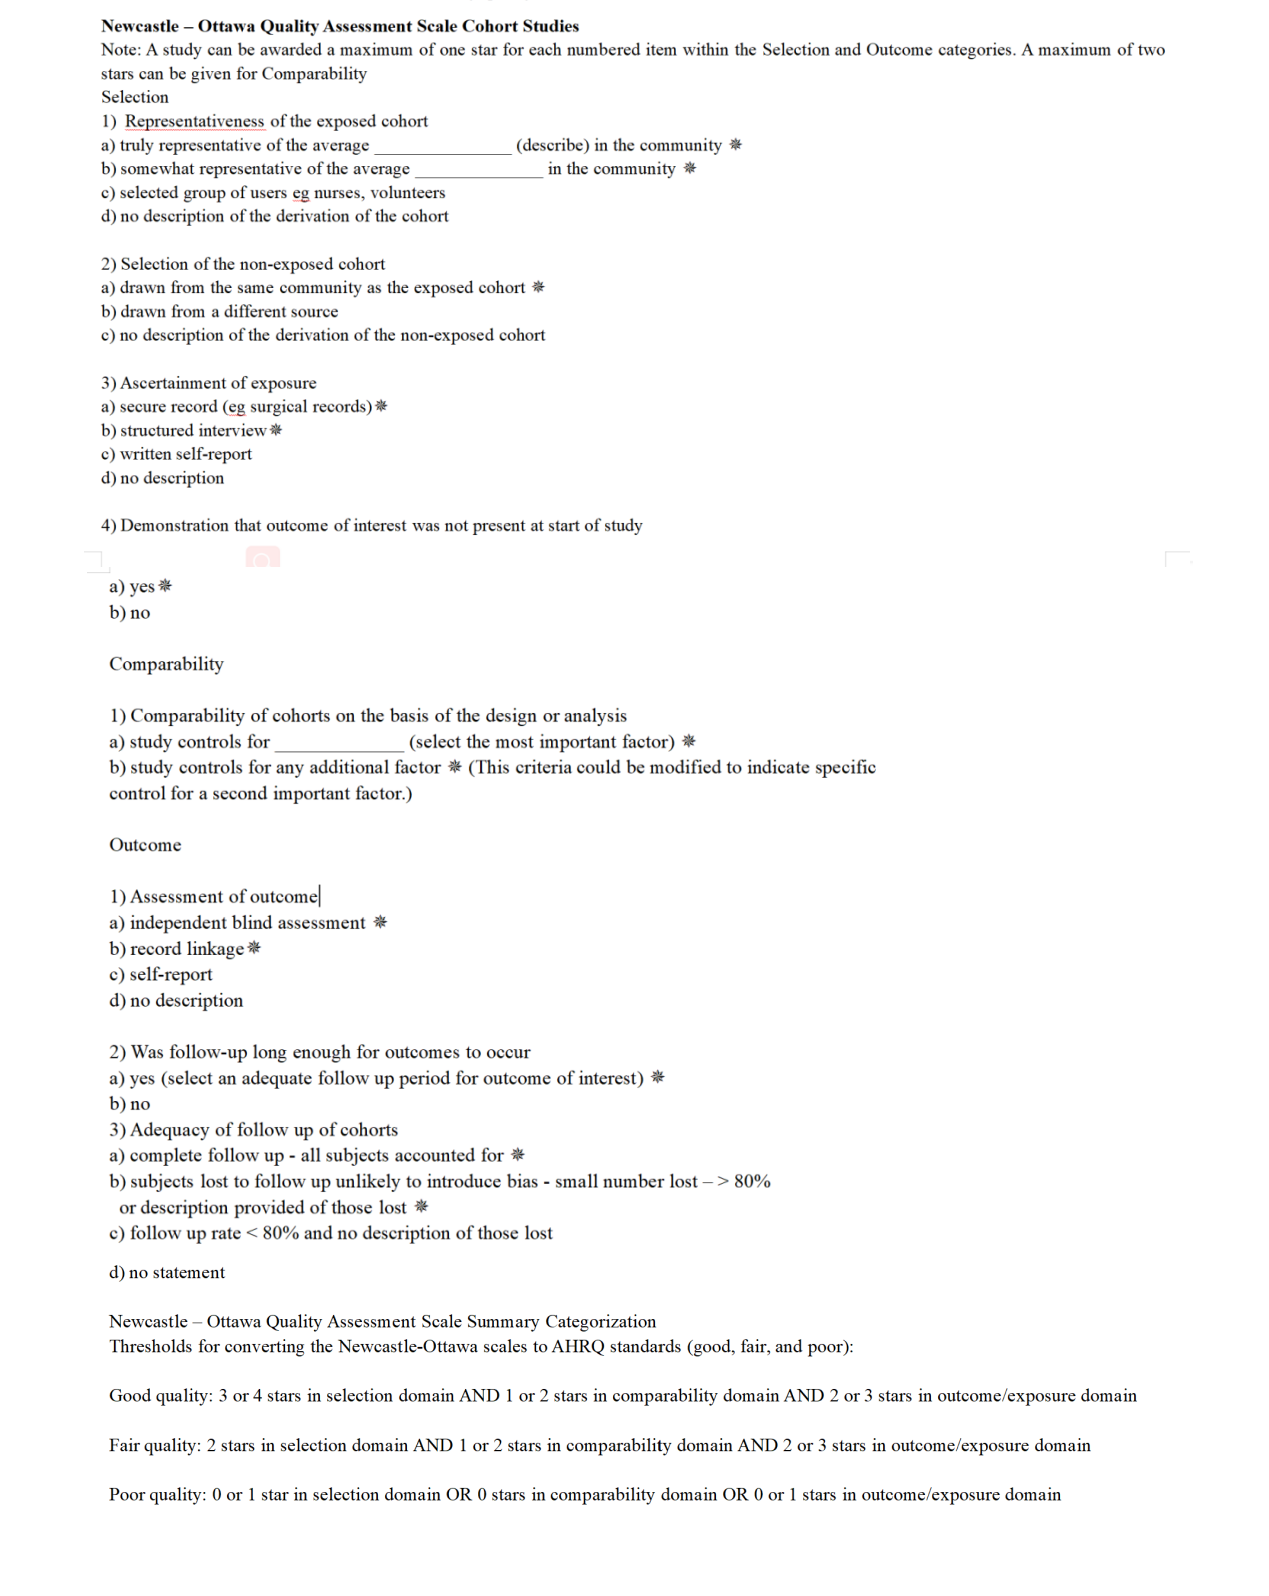
**Additional Figure 1. Description of Newcastle Ottawa Scale**

**Newcastle Ottawa Scale study quality assessment**

| Author | Representative | Non-Exposed | Exposure | Outcome not present | Control for confounding a | Outcome | Follow up | Adequate Follow up b | Score c | Overall Qualityd |
| --- | --- | --- | --- | --- | --- | --- | --- | --- | --- | --- |
| Lu Ma/2008[23] | 1 | 1 | 1 | 1 | 2 | 1 | 1 | 0 | 8 | Good |
| Bing-Yu Chen/2010[24] | 1 | 1 | 1 | 1 | 2 | 1 | 1 | 0 | 8 | Good |
| Shin Yamazaki/2011[25] | 0 | 1 | 1 | 1 | 2 | 1 | 1 | 1 | 8 | Good |
| Ludmilla/2012[26] | 1 | 1 | 1 | 1 | 2 | 1 | 1 | 1 | 9 | Good |
| Ludmilla/2014[27] | 0 | 1 | 1 | 1 | 2 | 1 | 1 | 1 | 8 | Good |
| Masanari/2016[28] | 0 | 1 | 1 | 1 | 2 | 1 | 1 | 1 | 8 | Good |
| Dandan Xu/2018[29] | 1 | 1 | 1 | 1 | 1 | 1 | 1 | 0 | 7 | Fair |
| Liu Weiyan/2019[11] | 1 | 1 | 1 | 1 | 1 | 1 | 1 | 1 | 8 | Good |
| Dandan Xu/2020[30] | 1 | 1 | 1 | 1 | 2 | 1 | 1 | 0 | 8 | Good |
| YANG Xiao Yan/2020[12] | 0 | 1 | 1 | 1 | 1 | 1 | 1 | 0 | 6 | Fair |
| WU Xingbin/2020[31] | 1 | 1 | 1 | 1 | 1 | 1 | 1 | 0 | 7 | Fair |

**Additional Table 2.** Newcastle Ottawa Scale study quality assessment

All categories were scored based on the Newcastle Ottawa Scale (NOS) with the exception of the category ―Control for confounding, see Supplemental Materials, Newcastle Ottawa Scale Assessment Score Cohort Studies. Studies may appear more than once in separate analyses.

aAdjustment for confounding considered: i)asthma status, asthmatic medicinal usage, passive smoking (excluded or adjusted) ii)environmental parameters such as temperature and humidity, and iii)individual factors such as age, gender, BMI, height, weight.

bAdequate follow-up defined as >80%

cThe summary score for each study was calculated by summing the scores from each category

dStudies were categorized for overall study quality based on the Newcastle Ottawa Scale categorization, see Supplemental Materials, Newcastle Ottawa Scale Summary Categorization

**Additional Table 3** Univariate Meta-Regression results for the association between PM2.5 and PEF of children

|  | **PEF** | | | | |
| --- | --- | --- | --- | --- | --- |
| **Covariate** | **# of**  **Studies** | **Beta ± SE** | **CI (95%)** | **P-value** | **R2** |
| Countrya | 10 |  |  | 0.0713 | 26.79% |
| China vs Brazil | 10 | -1.6226±0.9065 | -3.3993 to 0.1541 | 0.0735 |  |
| Japan vs Brazil | 10 | -2.2519±0.9973 | -4.2066 to -0.2971 | 0.0240 * |  |
| Brazil vs others | 10 | 1.8522±0.8328 | 0.2201 to 3.4844 | 0.0261 * | 30.99% |
| Severe asthma statusa | 10 | -1.5829±0.9354 | -3.4163 to 0.2505 | 0.0906 | 16.71% |
| Sample size | 10 | 1.6164±0.8868 | -0.1218 to 3.3546 | 0.0684 | 21.71% |
| Statistic methods | 10 | 0.5349±0.9127 | -1.2539 to 2.3238 | 0.5578 | 0% |
| Publication year | 10 | 0.0285±0.1042 | -0.1758 to 0.2328 | 0.7842 | 0% |

Statistic methods: Liner mixed models vs Others

Severe asthma status:Severe asthma vs non-severe asthma

Sample size:Sample size≥500 vs Sample size<500

Publication year:The year research in which research was published

a, Factors assessed using sub-group as the study of analysis instead of study as the unit of analysis

*, *P*＜0.05 , Statistically significant results.

**Additional Figure 2.** Funnel plot of changes in PEF (L/min) estimates associated with a 10µg/m3 increases in PM2.5


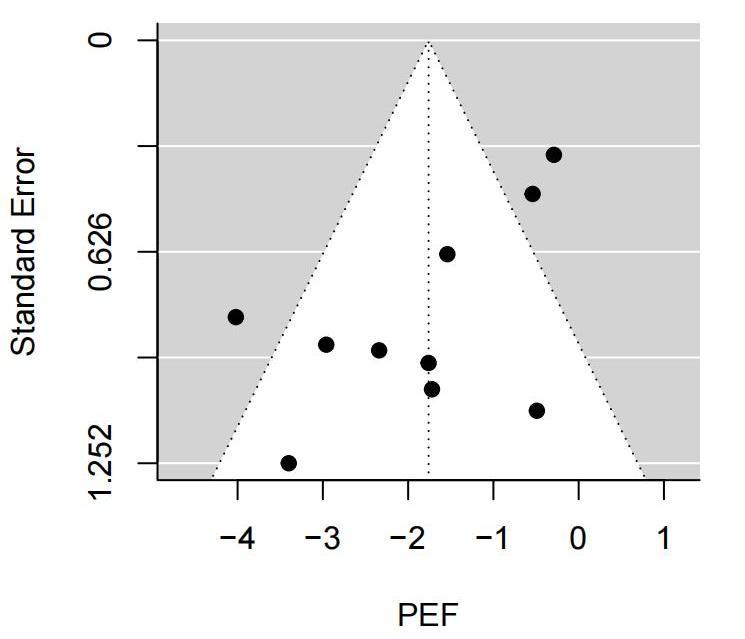


**Additional Figure 3.** Funnel plot of changes in FVC (L) estimates associated with a 10µg/m3 increases in PM2.5


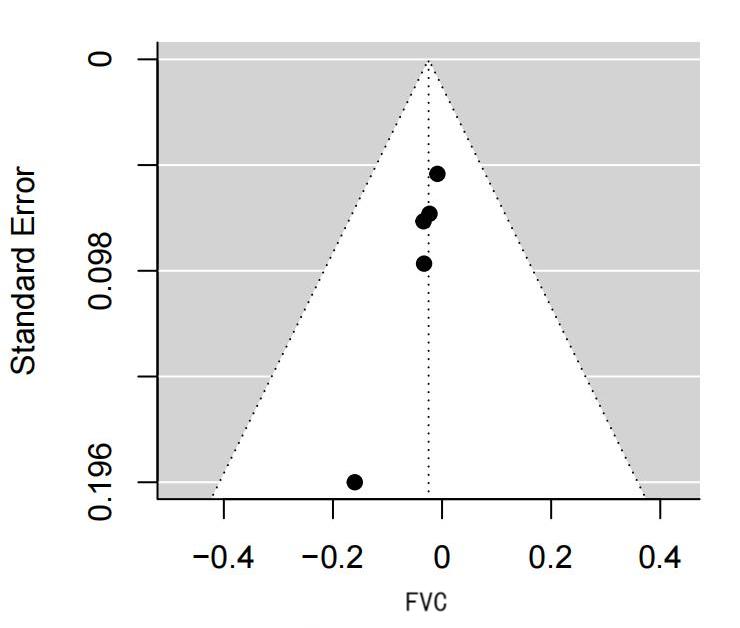


**Additional Figure 4.** Funnel plot of changes in FEV1 (L) estimates associated with a 10µg/m3 increases in PM2.5.


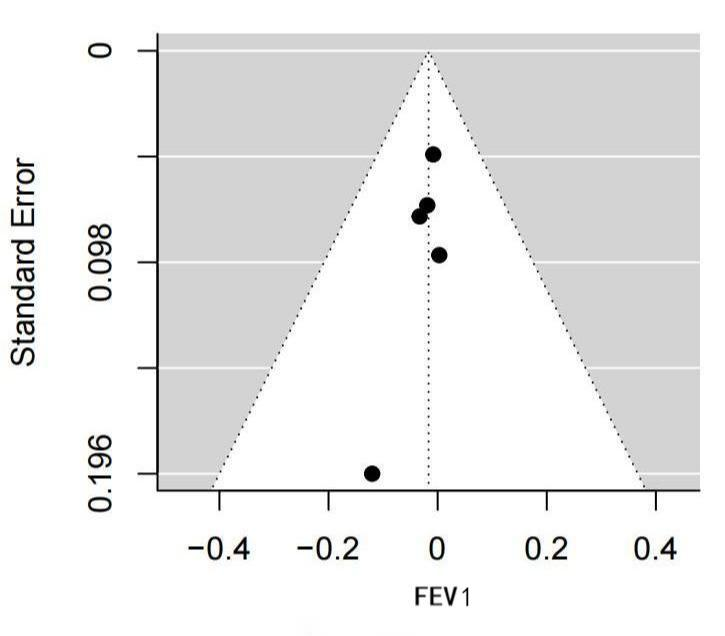

Supplement: Supplementary file 1 [file get_supplementary_file.php]
